# Supplementary material
Source: PubMed Central journal article supplement (PMC10358039)

A.

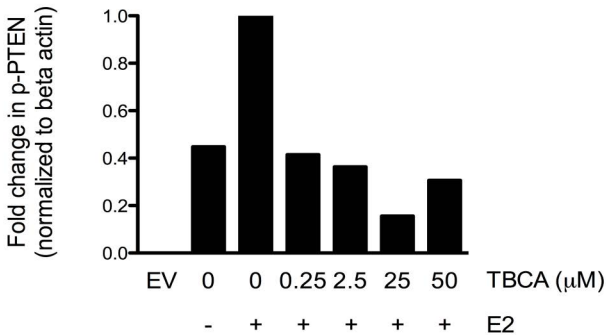

B.

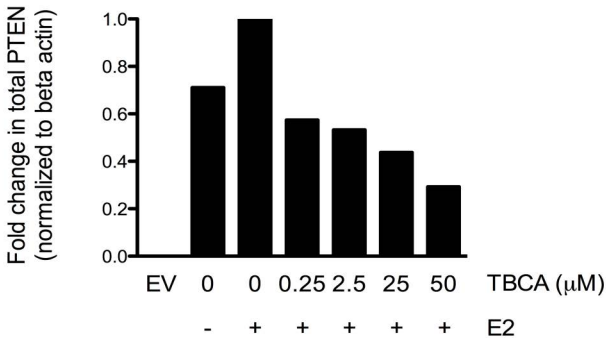

Supplement: 12672_2014_184_MOESM1_ESM.pdf [file 12672_2014_184_MOESM1_ESM.pdf]

A.

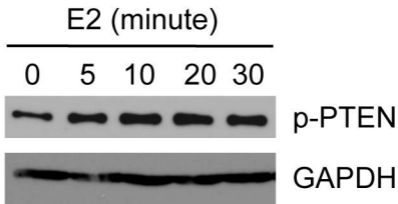

B.

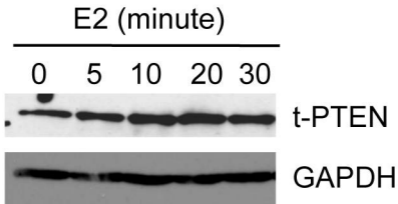

Supplement: 12672_2014_184_MOESM2_ESM.pdf [file 12672_2014_184_MOESM2_ESM.pdf]

A.

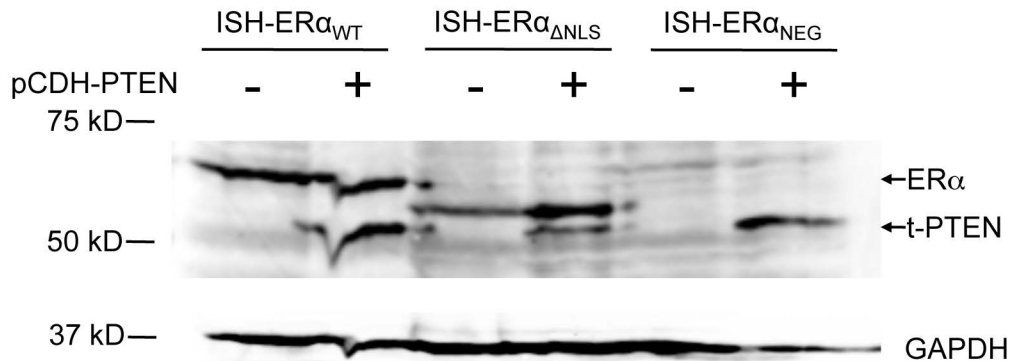

B.

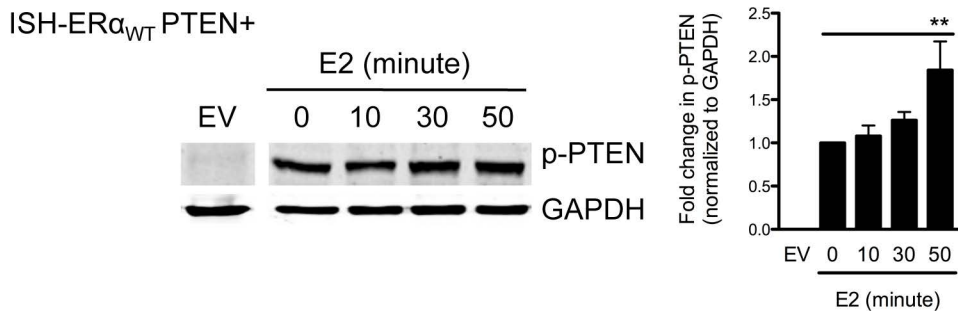

C.

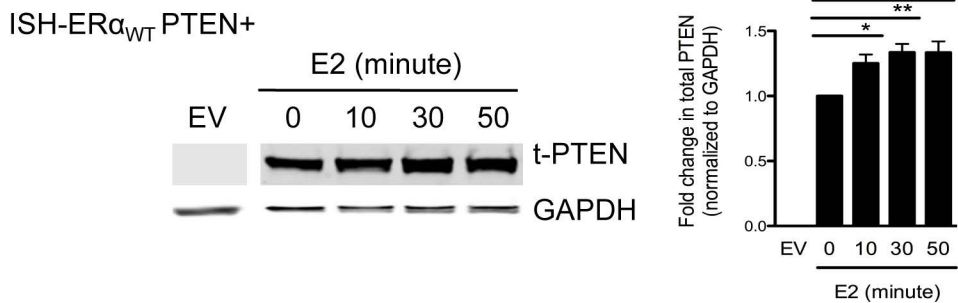

Supplement: 12672_2014_184_MOESM3_ESM.pdf [file 12672_2014_184_MOESM3_ESM.pdf]
